# Supplementary material for: Being Active during the Lockdown: The Recovery Potential of Physical Activity for Well-Being
Source: MDPI journal article supplement (doi:10.3390/ijerph18041707), 2021-02-10
Supplement: s1 [file s1]

Table 1. Correlation matrix for main variables included in the study

|                                          | M      | SD     | Observed<br>Range | 1        | 2         | 3        | 4     | 5     | 6         | 7      | 8        | 9      | 10       | 11       | 12       | 13        | 14        | 15        |
|------------------------------------------|--------|--------|-------------------|----------|-----------|----------|-------|-------|-----------|--------|----------|--------|----------|----------|----------|-----------|-----------|-----------|
| 1. Sex                                   | -      | -      | -                 |          |           |          |       |       |           |        |          |        |          |          |          |           |           |           |
| 2. Age                                   | 34.06  | 14.18  | 17-91             | -0.08    |           |          |       |       |           |        |          |        |          |          |          |           |           |           |
| 3. Number of children                    | 0.62   | 1.12   | 0-7               | -0.08    | 0.03      |          |       |       |           |        |          |        |          |          |          |           |           |           |
| 4. Housing with or without outside space | -      | -      | -                 | 0.06     | 0.01      | 0.36**** |       |       |           |        |          |        |          |          |          |           |           |           |
| 5. House sizing                          | 104.65 | 62.32  | 9-477             | -0.08    | 0.08      | 0.29**** | 0.13* |       |           |        |          |        |          |          |          |           |           |           |
| 6. Face-to-face work                     | -      | -      | -                 | 0.00     | 0.07      | -0.04    | 0.01  | 0.05  |           |        |          |        |          |          |          |           |           |           |
| 7. Teleworking                           | -      | -      | -                 | 0.02     | 0.03      | -0.09    | -0.08 | 0.01  | -0.39**** |        |          |        |          |          |          |           |           |           |
| 8. MVPA                                  | 400.52 | 325.02 | 0-2130            | -0.09    | -0.07     | 0.08     | 0.06  | -0.07 | -0.06     | -0.02  |          |        |          |          |          |           |           |           |
| 9. Usual level of PA                     | 3.02   | 0.91   | 1-4               | -0.18**  | -0.29**** | 0.07     | 0.04  | -0.10 | -0.08     | -0.03  | 0.34**** |        |          |          |          |           |           |           |
| 10. Detachment                           | 4.61   | 1.41   | 1-7               | 0.10     | -0.08     | 0.07     | 0.08  | 0.00  | -0.01     | 0.06   | 0.24**** | 0.08   |          |          |          |           |           |           |
| 11. Relaxation                           | 5.26   | 1.28   | 1-7               | 0.03     | -0.10*    | 0.05     | 0.06  | -0.03 | -0.07     | 0.16** | 0.24**** | 0.12*  | 0.72**** |          |          |           |           |           |
| 12. Mastery                              | 3.90   | 1.40   | 1-7               | 0.09     | -0.14**   | 0.04     | 0.02  | -0.03 | -0.03     | 0.06   | 0.25**** | 0.01   | 0.53**** | 0.53**** |          |           |           |           |
| 13. Control over leisure time            | 4.93   | 1.42   | 1-7               | 0.00     | -0.08     | 0.09     | 0.09  | -0.10 | -0.05     | -0.02  | 0.30**** | 0.14** | 0.53**** | 0.61**** | 0.59**** |           |           |           |
| 14. Need satisfaction                    | 5.30   | .85    | 1-7               | -0.14**  | 0.08      | 0.11*    | 0.03  | -0.03 | 0.00      | 0.02   | 0.16**   | -0.01  | 0.25**** | 0.31**** | 0.29**** | 0.38****  |           |           |
| 15. Subjective vitality                  | 4.24   | 1.27   | 1-7               | -0.12*   | 0.06      | 0.07     | 0.07  | -0.03 | 0.04      | 0.00   | 0.23**** | 0.03   | 0.23**** | 0.28**** | 0.36**** | 0.35****  | 0.52****  |           |
| 16. Perceived stress                     | 3.17   | 1.17   | 1-7               | 0.25**** | -0.14**   | -0.02    | -0.05 | 0.04  | 0.02      | -0.09  | -0.02    | -0.06  | -0.03    | -0.17**  | -0.13**  | -0.23**** | -0.57**** | -0.45**** |

Note. MVPA = Minutes of Moderate to Vigorous Physical Activity per week. PA = Physical Activity. \* $p < .05$ . \*\* $p < .01$ . \*\*\* $p < .001$ . For sex, women were coded 0. For presence to an outside space, no was coded 0. For face-to-face work, "No" was coded 0. For Teleworking, "No" was coded 0.
